# Supplementary material for: Prognostic value of the common tumour-infiltrating lymphocyte subtypes for patients with non-small cell lung cancer: A meta-analysis
Source: PubMed Central journal article supplement (PMC7654825; doi:10.1371/journal.pone.0242173), 2020-11-10
Supplement: pone.0242173.s002.pdf [file pone.0242173.s002.pdf]

S2 Table. Quality assessment of included studies. ○= low risk of bias, ◐= moderate risk of bias, ●= high risk of bias.

| Study                  | Study Participation | Study Attrition | Prognostic factor Measurement | Outcome Measurement | Study Confounding | Statistical Analysis and Reporting | Total Risk of Bias |
|------------------------|---------------------|-----------------|-------------------------------|---------------------|-------------------|------------------------------------|--------------------|
| Jeremy Goc             | ○                   | ●               | ◐                             | ◐                   | ○                 | ○                                  | Moderate           |
| Jiewei Chen            | ○                   | ●               | ○                             | ○                   | ○                 | ○                                  | Low                |
| Yoichi Ohtaki          | ○                   | ◐               | ○                             | ○                   | ○                 | ○                                  | Low                |
| Chuntao Tian           | ○                   | ●               | ◐                             | ○                   | ○                 | ○                                  | Low                |
| Zhangguo Hu            | ○                   | ●               | ◐                             | ○                   | ◐                 | ○                                  | Moderate           |
| Zachary D. Horne, B.S. | ◐                   | ●               | ◐                             | ◐                   | ◐                 | ○                                  | High               |
| Xiangjiao Meng         | ○                   | ◐               | ○                             | ○                   | ○                 | ○                                  | Low                |
| Wen Feng               | ○                   | ●               | ◐                             | ○                   | ○                 | ○                                  | Low                |
| Tom Donnem             | ○                   | ●               | ◐                             | ○                   | ◐                 | ○                                  | Moderate           |
| TAKEO HASEGAWA         | ○                   | ●               | ○                             | ○                   | ○                 | ○                                  | Low                |
| T. Kinoshita           | ○                   | ●               | ◐                             | ○                   | ◐                 | ○                                  | Moderate           |

|                             |   |   |   |   |   |   |          |
|-----------------------------|---|---|---|---|---|---|----------|
| Souptik Barua               | ○ | ● | ○ | ○ | ○ | ○ | Low      |
| Satoshi Ikeda               | ○ | ● | ● | ● | ● | ○ | High     |
| Rebecca P. Petersen         | ○ | ● | ● | ● | ○ | ○ | Moderate |
| Osamu Wakabayashi           | ○ | ● | ● | ● | ○ | ○ | Moderate |
| Mehrdad Talebian Yazdi      | ● | ● | ● | ● | ○ | ○ | High     |
| Marta Usó                   | ● | ● | ● | ○ | ● | ○ | High     |
| Marius Ilie                 | ○ | ● | ● | ● | ○ | ○ | Moderate |
| Marie-Caroline Dieu-Nosjean | ○ | ● | ○ | ○ | ● | ○ | Low      |
| Kyuichi Kadota              | ○ | ● | ○ | ○ | ○ | ○ | Low      |
| Khalid I. Al-Shibli         | ○ | ● | ○ | ○ | ● | ○ | Low      |
| KHALID AL-SHIBLI            | ○ | ● | ○ | ○ | ● | ○ | Low      |
| K Hiraoka                   | ○ | ● | ● | ● | ○ | ○ | Moderate |
| Hui Yang                    | ○ | ● | ● | ○ | ○ | ○ | Low      |

|                       |   |   |   |   |   |   |          |
|-----------------------|---|---|---|---|---|---|----------|
| Hiroyuki Tao          | ○ | ● | ◐ | ◐ | ○ | ○ | Moderate |
| Haiyue Wang           | ○ | ● | ◐ | ◐ | ● | ○ | High     |
| Gian Kayser           | ○ | ● | ○ | ○ | ○ | ○ | Low      |
| Fuqiang Dai           | ○ | ● | ○ | ○ | ○ | ○ | Low      |
| Feifei Teng           | ◐ | ● | ◐ | ○ | ● | ○ | High     |
| Fayçal Djenidi        | ○ | ● | ○ | ○ | ○ | ○ | Low      |
| Enrico Ruffini        | ○ | ● | ◐ | ○ | ● | ○ | Moderate |
| Eiki Kikuchi          | ○ | ● | ◐ | ○ | ○ | ○ | Low      |
| Dermot S. O'Callaghan | ○ | ◐ | ○ | ○ | ○ | ○ | Low      |
| Mariam Gachechiladze  | ○ | ◐ | ○ | ○ | ○ | ○ | Low      |
| Fumihiko Kinoshita    | ○ | ● | ○ | ○ | ○ | ○ | Low      |
| Ahrong Kim            | ○ | ● | ◐ | ◐ | ○ | ○ | Moderate |
| Lu Chen               | ◐ | ● | ◐ | ○ | ○ | ○ | Moderate |

|                      |   |   |   |   |   |   |          |
|----------------------|---|---|---|---|---|---|----------|
| Yoshinori Handa      | ○ | ● | ○ | ○ | ● | ○ | Low      |
| Arik Bernard Schulze | ○ | ● | ● | ○ | ● | ○ | Moderate |
| Kei Suzuki           | ○ | ● | ● | ● | ○ | ○ | Moderate |
| Germán Corredor      | ○ | ● | ● | ○ | ○ | ○ | Low      |
| Hee Eun Lee          | ○ | ● | ● | ○ | ○ | ○ | Low      |
| Jianqing Hao         | ○ | ● | ○ | ○ | ○ | ○ | Low      |
| Senga K. Johnson     | ○ | ● | ● | ● | ● | ○ | High     |
| Katsuhiko Shimizu    | ○ | ● | ● | ○ | ○ | ○ | Low      |
