# Supplementary material for: Prognostic value of the common tumour-infiltrating lymphocyte subtypes for patients with non-small cell lung cancer: A meta-analysis
Source: PubMed Central journal article supplement (PMC7654825; doi:10.1371/journal.pone.0242173), 2020-11-10
Supplement: pone.0242173.s011.pdf [file pone.0242173.s011.pdf]

PubMed Advanced Search Builder

Add terms to the query box



ADD

Show Index

Query box

Search

History and Search Details

| Search | Actions | Details | Query                                                                                                                                                                                                                                                                                                                                                                                                                                                                                                                                                                                                                                                                                                                                                                                                                                                                                                                      | Results | Time     |
|--------|---------|---------|----------------------------------------------------------------------------------------------------------------------------------------------------------------------------------------------------------------------------------------------------------------------------------------------------------------------------------------------------------------------------------------------------------------------------------------------------------------------------------------------------------------------------------------------------------------------------------------------------------------------------------------------------------------------------------------------------------------------------------------------------------------------------------------------------------------------------------------------------------------------------------------------------------------------------|---------|----------|
| #27    | ...     |         | Search: ((((((((((tumor-infiltrating lymphocyte[Title/Abstract]) OR (tumor-infiltrating lymphocytes[Title/Abstract]) OR (tumor Infiltrating lymphocyte[Title/Abstract]) OR (TIL[Title/Abstract]) OR (TILs[Title/Abstract]) OR (intratumoral lymphocyte[Title/Abstract]) OR (intra-tumoral lymphocyte[Title/Abstract]) OR (FOXP3-positive T lymphocytes[Title/Abstract]) OR (CD8-positive T Lymphocytes[Title/Abstract]) OR (CD3-positive T Lymphocytes[Title/Abstract]) OR (CD4-positive T Lymphocytes[Title/Abstract]) OR (CD20-positive Lymphocytes[Title/Abstract]) AND (((((((non-small cell lung cancer[Title/Abstract]) OR (NSCLC[Title/Abstract]) OR (small cell lung cancer[Title/Abstract]) OR (SCLC[Title/Abstract]) OR (Lung Squamous cell carcinoma[Title/Abstract]) OR (lung cancer[Title/Abstract]) OR (lung tumor[Title/Abstract]) OR (lung carcinoma[Title/Abstract]) OR (pulmonary[Title/Abstract]))))))) | 636     | 01:12:25 |
| #25    | ...     |         | Search: (((((((non-small cell lung cancer[Title/Abstract]) OR (NSCLC[Title/Abstract]) OR (small cell lung cancer[Title/Abstract]) OR (SCLC[Title/Abstract]) OR (Lung Squamous cell carcinoma[Title/Abstract]) OR (lung cancer[Title/Abstract]) OR (lung tumor[Title/Abstract]) OR (lung carcinoma[Title/Abstract]) OR (pulmonary[Title/Abstract])))))))                                                                                                                                                                                                                                                                                                                                                                                                                                                                                                                                                                    | 705,234 | 01:11:45 |
| #24    | ...     |         | Search: pulmonary[Title/Abstract]                                                                                                                                                                                                                                                                                                                                                                                                                                                                                                                                                                                                                                                                                                                                                                                                                                                                                          | 546,874 | 01:11:25 |
| #23    | ...     |         | Search: lung carcinoma[Title/Abstract]                                                                                                                                                                                                                                                                                                                                                                                                                                                                                                                                                                                                                                                                                                                                                                                                                                                                                     | 18,533  | 01:11:15 |
| #22    | ...     |         | Search: lung tumor[Title/Abstract]                                                                                                                                                                                                                                                                                                                                                                                                                                                                                                                                                                                                                                                                                                                                                                                                                                                                                         | 6,241   | 01:11:03 |
| #21    | ...     |         | Search: lung cancer[Title/Abstract]                                                                                                                                                                                                                                                                                                                                                                                                                                                                                                                                                                                                                                                                                                                                                                                                                                                                                        | 157,613 | 01:10:41 |
| #20    | ...     |         | Search: Lung Squamous cell carcinoma[Title/Abstract]                                                                                                                                                                                                                                                                                                                                                                                                                                                                                                                                                                                                                                                                                                                                                                                                                                                                       | 1,387   | 01:10:31 |
| #19    | ...     |         | Search: SCLC[Title/Abstract]                                                                                                                                                                                                                                                                                                                                                                                                                                                                                                                                                                                                                                                                                                                                                                                                                                                                                               | 7,894   | 01:10:21 |
| #18    | ...     |         | Search: small cell lung cancer[Title/Abstract]                                                                                                                                                                                                                                                                                                                                                                                                                                                                                                                                                                                                                                                                                                                                                                                                                                                                             | 67,124  | 01:09:55 |
| #17    | ...     |         | Search: NSCLC[Title/Abstract]                                                                                                                                                                                                                                                                                                                                                                                                                                                                                                                                                                                                                                                                                                                                                                                                                                                                                              | 43,732  | 01:09:43 |
| #16    | ...     |         | Search: non-small cell lung cancer[Title/Abstract]                                                                                                                                                                                                                                                                                                                                                                                                                                                                                                                                                                                                                                                                                                                                                                                                                                                                         | 57,264  | 01:09:31 |
| #14    | ...     |         | Search: ((((((((((tumor-infiltrating lymphocyte[Title/Abstract]) OR (tumor-infiltrating lymphocytes[Title/Abstract]) OR (tumor Infiltrating lymphocyte[Title/Abstract]) OR (TIL[Title/Abstract]) OR (TILs[Title/Abstract]) OR (intratumoral lymphocyte[Title/Abstract]) OR (intra-tumoral lymphocyte[Title/Abstract]) OR (FOXP3-positive T lymphocytes[Title/Abstract]) OR (CD8-positive T Lymphocytes[Title/Abstract]) OR (CD3-positive T Lymphocytes[Title/Abstract]) OR (CD4-positive T Lymphocytes[Title/Abstract]) OR (CD20-positive Lymphocytes[Title/Abstract])))))))                                                                                                                                                                                                                                                                                                                                               | 7,507   | 01:08:41 |
| #13    | ...     |         | Search: CD20-positive Lymphocytes[Title/Abstract]                                                                                                                                                                                                                                                                                                                                                                                                                                                                                                                                                                                                                                                                                                                                                                                                                                                                          | 23      | 01:07:35 |
| #12    | ...     |         | Search: CD4-positive T Lymphocytes[Title/Abstract]                                                                                                                                                                                                                                                                                                                                                                                                                                                                                                                                                                                                                                                                                                                                                                                                                                                                         | 176     | 01:07:25 |
| #11    | ...     |         | Search: CD3-positive T Lymphocytes[Title/Abstract]                                                                                                                                                                                                                                                                                                                                                                                                                                                                                                                                                                                                                                                                                                                                                                                                                                                                         | 90      | 01:07:15 |
| #10    | ...     |         | Search: CD8-positive T Lymphocytes[Title/Abstract]                                                                                                                                                                                                                                                                                                                                                                                                                                                                                                                                                                                                                                                                                                                                                                                                                                                                         | 183     | 01:07:05 |
| #9     | ...     |         | Search: FOXP3-positive T lymphocytes[Title/Abstract]                                                                                                                                                                                                                                                                                                                                                                                                                                                                                                                                                                                                                                                                                                                                                                                                                                                                       | 26      | 01:06:55 |
| #8     | ...     |         | Search: intra-tumoral lymphocyte[Title/Abstract]                                                                                                                                                                                                                                                                                                                                                                                                                                                                                                                                                                                                                                                                                                                                                                                                                                                                           | 42      | 01:06:43 |
| #7     | ...     |         | Search: intratumoral lymphocyte[Title/Abstract]                                                                                                                                                                                                                                                                                                                                                                                                                                                                                                                                                                                                                                                                                                                                                                                                                                                                            | 22      | 01:06:30 |
| #6     | ...     |         | Search: TILs[Title/Abstract]                                                                                                                                                                                                                                                                                                                                                                                                                                                                                                                                                                                                                                                                                                                                                                                                                                                                                               | 2,611   | 01:06:19 |
| #5     | ...     |         | Search: TIL[Title/Abstract]                                                                                                                                                                                                                                                                                                                                                                                                                                                                                                                                                                                                                                                                                                                                                                                                                                                                                                | 3,097   | 01:06:12 |
| #4     | ...     |         | Search: tumor Infiltrating lymphocyte[Title/Abstract]                                                                                                                                                                                                                                                                                                                                                                                                                                                                                                                                                                                                                                                                                                                                                                                                                                                                      | 647     | 01:06:02 |
| #3     | ...     |         | Search: tumor infiltrating lymphocytes[Title/Abstract]                                                                                                                                                                                                                                                                                                                                                                                                                                                                                                                                                                                                                                                                                                                                                                                                                                                                     | 5,055   | 01:05:42 |
| #2     | ...     |         | Search: tumor-infiltrating lymphocytes[Title/Abstract]                                                                                                                                                                                                                                                                                                                                                                                                                                                                                                                                                                                                                                                                                                                                                                                                                                                                     | 5,055   | 01:05:22 |
| #1     | ...     |         | Search: tumor-infiltrating lymphocyte[Title/Abstract]                                                                                                                                                                                                                                                                                                                                                                                                                                                                                                                                                                                                                                                                                                                                                                                                                                                                      | 647     | 01:05:08 |

Showing 1 to 25 of 25 entries
